# Supplementary material for: New bio-renewable polyester with rich side amino groups from l-lysine via controlled ring-opening polymerization
Source: Royal Society of Chemistry journal article supplement (doi:10.1039/c4py00930d), 2014-01-01
Supplement: c4py00930d1.pdf [file c4py00930d1.pdf]

## Supporting information

### **New Bio-renewable Polyester with Rich Side Amino-groups from L-Lysine via Controlled Ring-opening polymerization**

Xiaoyu Chen, Haiwang Lai, Chunsheng Xiao, Huayu Tian, Xuesi Chen, Youhua Tao\* and  
Xianhong Wang\*

*Key Laboratory of Polymer Ecomaterials, Changchun Institute of Applied Chemistry, Chinese Academy of Sciences, Renmin Street 5625, Changchun 130022, People's Republic of China*

E-mail: [xhwang@ciac.ac.cn](mailto:xhwang@ciac.ac.cn), [youhua.tao@ciac.ac.cn](mailto:youhua.tao@ciac.ac.cn)

Figure S1. <sup>1</sup>H NMR (400 MHz; CDCl<sub>3</sub>) spectrum of *L*-lysine(Cbz)-OH.

Figure S2. The FTIR spectrums of lysine-based polyester before (A) and after (B) deprotection.

Figure S3. GPC curves of the polymers obtained in the block polymerization with DMAP as the catalyst and IB as the initiator in CH<sub>2</sub>Cl<sub>2</sub> at room temperature.

Figure S4. <sup>1</sup>H NMR (400 MHz; CDCl<sub>3</sub>) spectrum of PEO<sub>112</sub>-*b*-Polyester<sub>9</sub>.

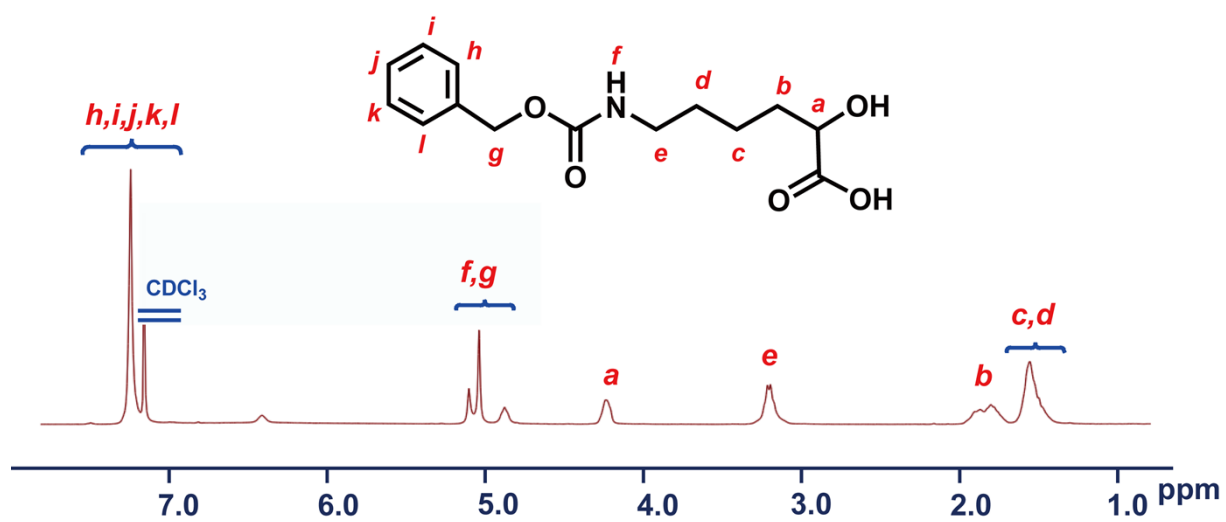

**Figure S1.** <sup>1</sup>H NMR (400 MHz; CDCl<sub>3</sub>) spectrum of *L*-lysine(Cbz)-OH.

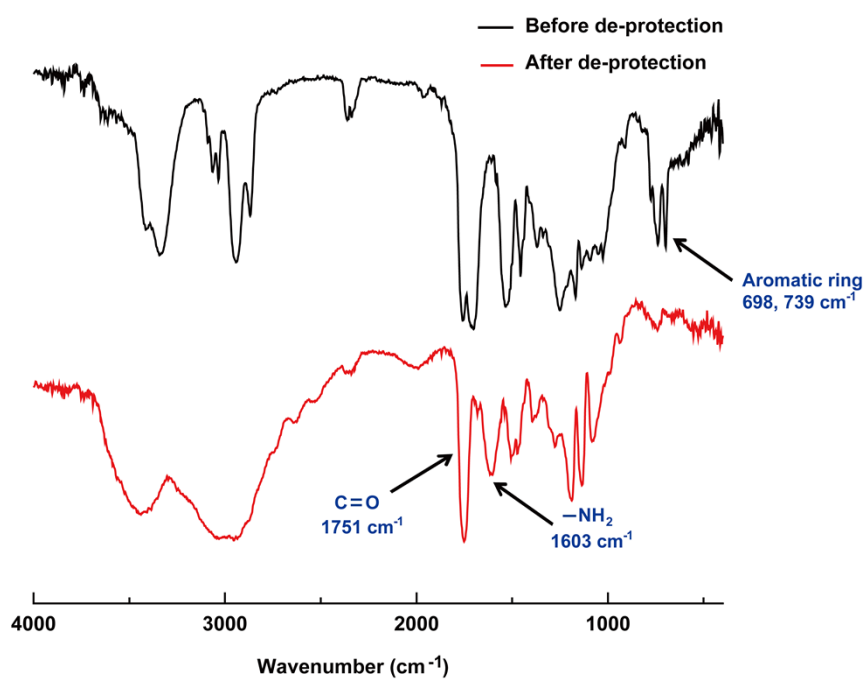

**Figure S2.** The FTIR spectrums of lysine-based polyester before (A) and after (B) deprotection.

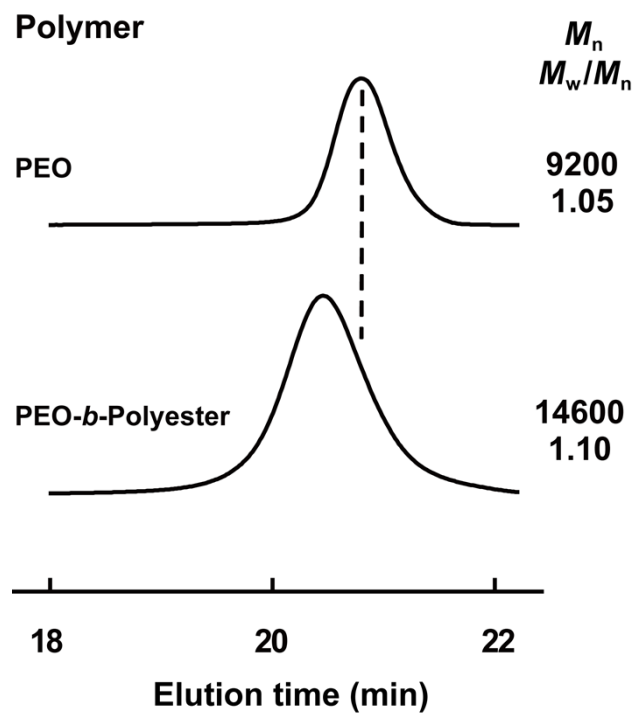

**Figure S3.** GPC curves of the polymers obtained in the block polymerization with DMAP as the catalyst and IB as the initiator in  $\text{CH}_2\text{Cl}_2$  at room temperature.

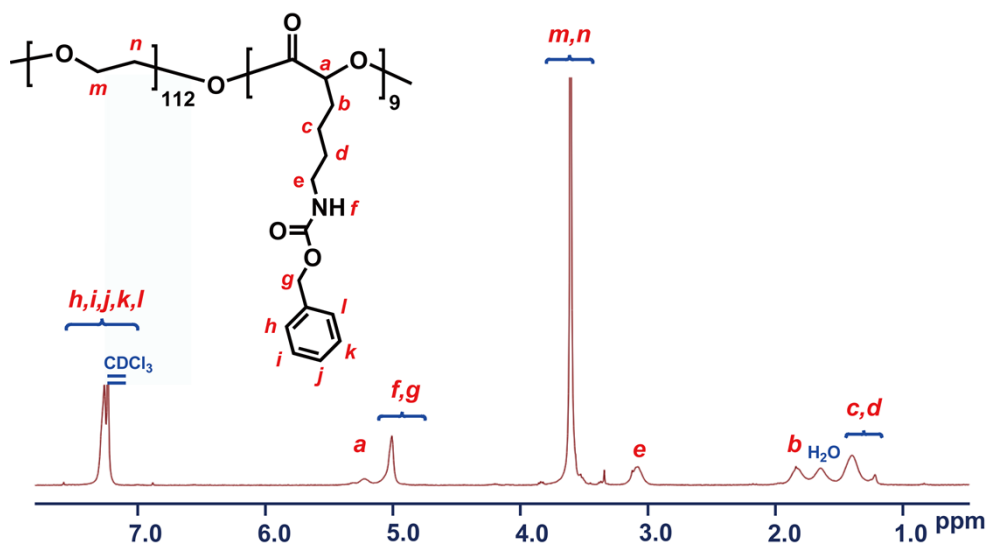

**Figure S4.** <sup>1</sup>H NMR (400 MHz; CDCl<sub>3</sub>) spectrum of PEO<sub>112</sub>-*b*-Polyester<sub>9</sub>.
